# Supplementary material for: Treatment with nanosomal paclitaxel lipid suspension versus conventional paclitaxel in metastatic breast cancer patients – a multicenter, randomized, comparative, phase II/III clinical study
Source: PubMed Central journal article supplement — Ther Adv Med Oncol. 2024 Apr 25;16:17588359241236442. doi: 10.1177/17588359241236442 (PMC11047258; doi:10.1177/17588359241236442), 2024-04-25
Supplement: sj-pdf-1-tam-10.1177_17588359241236442.pdf [file sj-pdf-1-tam-10.1177_17588359241236442.pdf]

## Checklist

### CONSORT 2010 checklist of information to include when reporting a randomised trial

| Section/Topic             | Item No | Checklist item                                                                                                          | Reported in (headings)                                                                                                         |
|---------------------------|---------|-------------------------------------------------------------------------------------------------------------------------|--------------------------------------------------------------------------------------------------------------------------------|
| <b>Title and abstract</b> |         |                                                                                                                         |                                                                                                                                |
|                           | 1a      | Identification as a randomised trial in the title                                                                       | Title page (Pg 1, Line 3-5)                                                                                                    |
|                           | 1b      | Structured summary of trial design, methods, results, and conclusions (for specific guidance see CONSORT for abstracts) | Abstract section (Pg 3, Line 35-56)                                                                                            |
| <b>Introduction</b>       |         |                                                                                                                         |                                                                                                                                |
| Background and objectives | 2a      | Scientific background and explanation of rationale                                                                      | Introduction section, paragraphs 1-2<br>(Pg 7, Line 127-145)                                                                   |
|                           | 2b      | Specific objectives or hypotheses                                                                                       | Introduction section, paragraphs 3<br>(Pg 7-8, Line 146-155)                                                                   |
| <b>Methods</b>            |         |                                                                                                                         |                                                                                                                                |
| Trial design              | 3a      | Description of trial design (such as parallel, factorial) including allocation ratio                                    | In Methods Section:<br>Trail design: Pg 8, Line 157-159<br>In Study design section:<br>Allocation ratio: Pg 9-10, Line 194-208 |
|                           | 3b      | Important changes to methods after trial commencement (such as eligibility criteria), with reasons                      | <b>Not applicable</b>                                                                                                          |
| Participants              | 4a      | Eligibility criteria for participants                                                                                   | In Methods : Patient populations –<br>Pg 8-9, Line 169-181                                                                     |
|                           | 4b      | Settings and locations where the data were collected                                                                    | In Methods: First paragraph<br>Pg 8, Line 157-159                                                                              |

|                                       |     |                                                                                                                                                                                             |                                                                                              |
|---------------------------------------|-----|---------------------------------------------------------------------------------------------------------------------------------------------------------------------------------------------|----------------------------------------------------------------------------------------------|
| Interventions                         | 5   | The interventions for each group with sufficient details to allow replication, including how and when they were actually administered                                                       | In Methods: Treatment section, Pg 9, Line 183-192                                            |
| Outcomes                              | 6a  | Completely defined pre-specified primary and secondary outcome measures, including how and when they were assessed                                                                          | In Methods: Study assessments section, Pg 11, Line 214-224                                   |
|                                       | 6b  | Any changes to trial outcomes after the trial commenced, with reasons                                                                                                                       | <b>Not applicable</b>                                                                        |
| Sample size                           | 7a  | How sample size was determined                                                                                                                                                              | In Methods: Study design and sample size (first paragraph), Pg 10, Line 196-201              |
|                                       | 7b  | When applicable, explanation of any interim analyses and stopping guidelines                                                                                                                | <b>Not applicable</b>                                                                        |
| Randomisation:<br>Sequence generation | 8a  | Method used to generate the random allocation sequence                                                                                                                                      | In study design: Line 198-201<br>In statistical analysis: Last two lines (236-238), Pg 11-12 |
|                                       | 8b  | Type of randomisation; details of any restriction (such as blocking and block size)                                                                                                         | Study design and sample size section: Pg 10, Line no. 194-201                                |
| Allocation concealment mechanism      | 9   | Mechanism used to implement the random allocation sequence (such as sequentially numbered containers), describing any steps taken to conceal the sequence until interventions were assigned | Study design and sample size section: Pg 10, Line no. 194-201                                |
| Implementation                        | 10  | Who generated the random allocation sequence, who enrolled participants, and who assigned participants to interventions                                                                     | In statistical analysis: Last line (Bio-statistician), Line 236-238                          |
| Blinding                              | 11a | If done, who was blinded after assignment to interventions (for example, participants, care providers, those assessing outcomes) and how                                                    | <b>Not applicable</b>                                                                        |
|                                       | 11b | If relevant, description of the similarity of interventions                                                                                                                                 | <b>Not applicable</b>                                                                        |
| Statistical methods                   | 12a | Statistical methods used to compare groups for primary and secondary outcomes                                                                                                               | Methods section: Statistical analysis, Pg 11-12, Line 226-238                                |
|                                       | 12b | Methods for additional analyses, such as subgroup analyses and adjusted analyses                                                                                                            | Methods section: Statistical analysis, Pg 11-12, Line 226-238                                |
| <b>Results</b>                        | 13a | For each group, the numbers of participants who were randomly assigned, received intended treatment, and were analysed for the primary outcome                                              | Results: Patient disposition; Figure 2                                                       |

|                                                      |     |                                                                                                                                                   |                                                                                               |
|------------------------------------------------------|-----|---------------------------------------------------------------------------------------------------------------------------------------------------|-----------------------------------------------------------------------------------------------|
| Participant flow (a diagram is strongly recommended) | 13b | For each group, losses and exclusions after randomisation, together with reasons                                                                  | Results: Patient disposition; Figure 2, Pg 12                                                 |
| Recruitment                                          | 14a | Dates defining the periods of recruitment and follow-up                                                                                           | Methods: First paragraph Pg 8, Line 157-159                                                   |
|                                                      | 14b | Why the trial ended or was stopped                                                                                                                | <b>Not applicable</b>                                                                         |
| Baseline data                                        | 15  | A table showing baseline demographic and clinical characteristics for each group                                                                  | Table 1, Pg 13                                                                                |
| Numbers analysed                                     | 16  | For each group, number of participants (denominator) included in each analysis and whether the analysis was by original assigned groups           | Results: Patient disposition; Figure 2, Pg 12                                                 |
| Outcomes and estimation                              | 17a | For each primary and secondary outcome, results for each group, and the estimated effect size and its precision (such as 95% confidence interval) | Results: Figure 3 (Pg 14); Table 2 (Pg 15)                                                    |
|                                                      | 17b | For binary outcomes, presentation of both absolute and relative effect sizes is recommended                                                       | <b>Not applicable</b>                                                                         |
| Ancillary analyses                                   | 18  | Results of any other analyses performed, including subgroup analyses and adjusted analyses, distinguishing pre-specified from exploratory         | <b>Not applicable</b>                                                                         |
| Harms                                                | 19  | All-important harms or unintended effects in each group (for specific guidance see CONSORT for harms)                                             | In Results: Safety section-Table 3 (Pg 16-17)                                                 |
| <b>Discussion</b>                                    |     |                                                                                                                                                   |                                                                                               |
| Limitations                                          | 20  | Trial limitations, addressing sources of potential bias, imprecision, and, if relevant, multiplicity of analyses                                  | Discussion section (Paragraph 7) Line 346-352                                                 |
| Generalisability                                     | 21  | Generalisability (external validity, applicability) of the trial findings                                                                         | Discussion: Comparison with conventional formulation, paragraph 1,2,3,4,5 (Line 304-345)      |
| Interpretation                                       | 22  | Interpretation consistent with results, balancing benefits and harms, and considering other relevant evidence                                     | Discussion and Conclusion section                                                             |
| <b>Other information</b>                             |     |                                                                                                                                                   |                                                                                               |
| Registration                                         | 23  | Registration number and name of trial registry                                                                                                    | Between abstract and Plain language summary (Pg 4); Also in Ethical Approval Section (Pg 20). |

Protocol 24 Where the full trial protocol can be accessed, if available

---

URL:

<https://ctri.nic.in/Clinicaltrials/advsearch2.php>

<https://ctri.nic.in/Clinicaltrials/showallp.php?id1=2135,11627&EncHid=&userName=Nanosomal%20Paclitaxel%20lipid%20suspension>

Funding 25 Sources of funding and other support (such as supply of drugs), role of funders

---

Funding section (Pg 21)

---
